# Supplementary material
Source: Research Square preprint supplement (doi:10.21203/rs.3.rs-9241604/v1)
Supplement: Supplementary file 1 [file 0a68952e93561af03e5d5ea0.docx]

**Supplementary Figure 1. Expression patterns and prognostic significance of integrins in cervical cancer.**

**
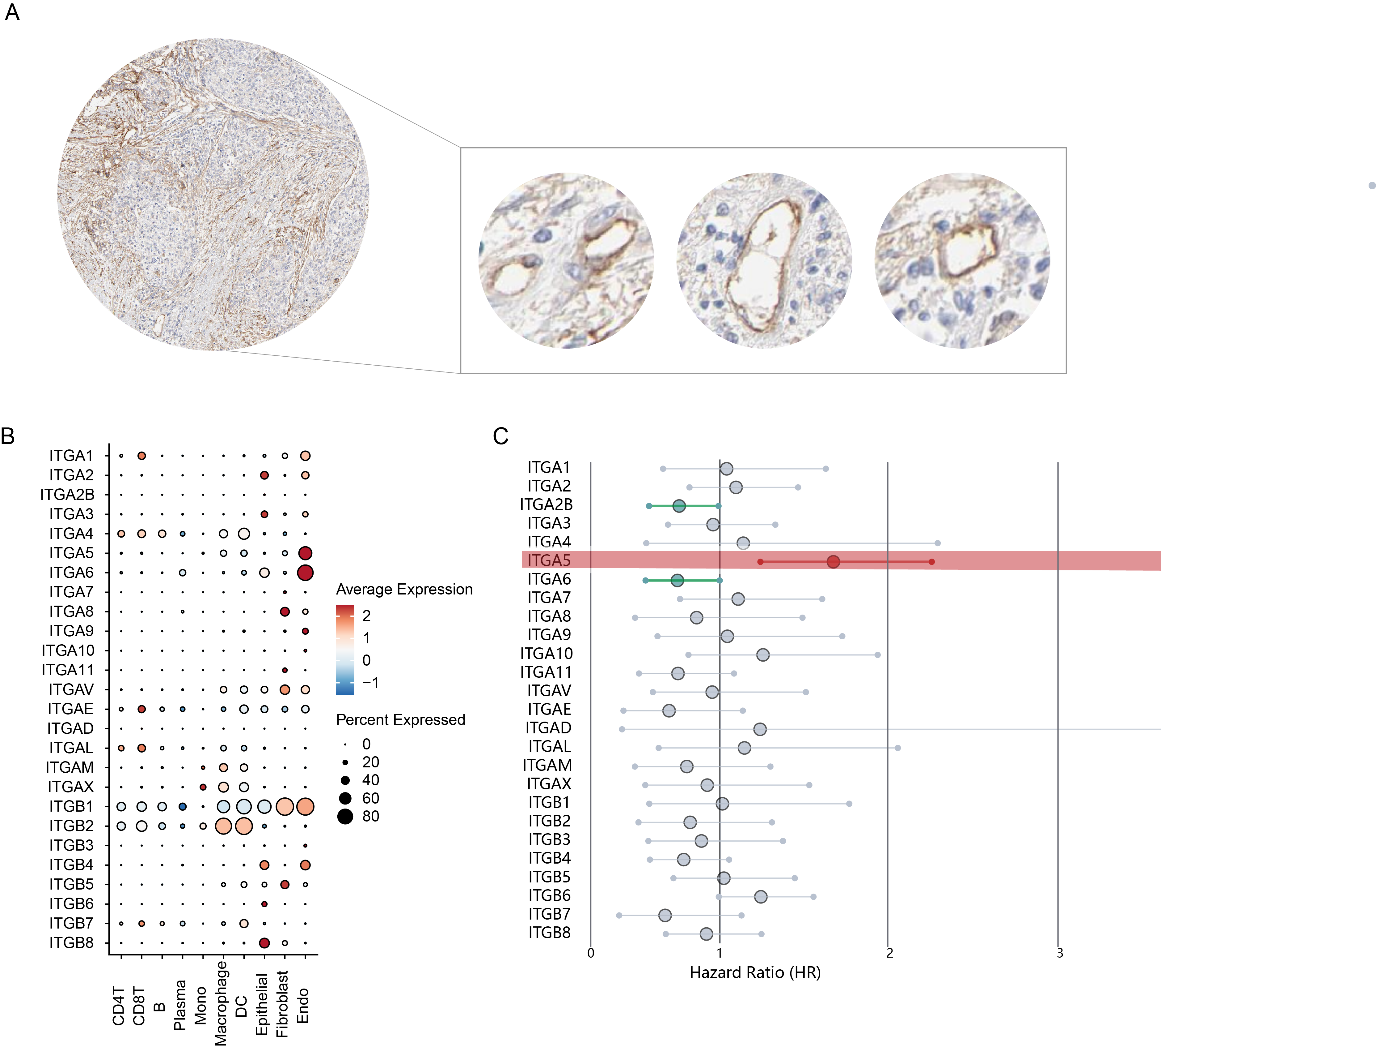
**

(A) Immunohistochemical staining of ITGA5 in tumor and stromal compartments, including vascular endothelial cells, as shown in the Human Protein Atlas. (B) Single-cell transcriptomic analysis revealed integrin expression across major cell types, including endothelial cells, immune cells and stromal cells. (C) Kaplan-Meier survival analysis from the GEPIA3 database identified ITGA5 as the only integrin significantly associated with poor prognosis.

**Supplementary File. The full uncropped Gels and Blots image(s) of Figure 3D.**


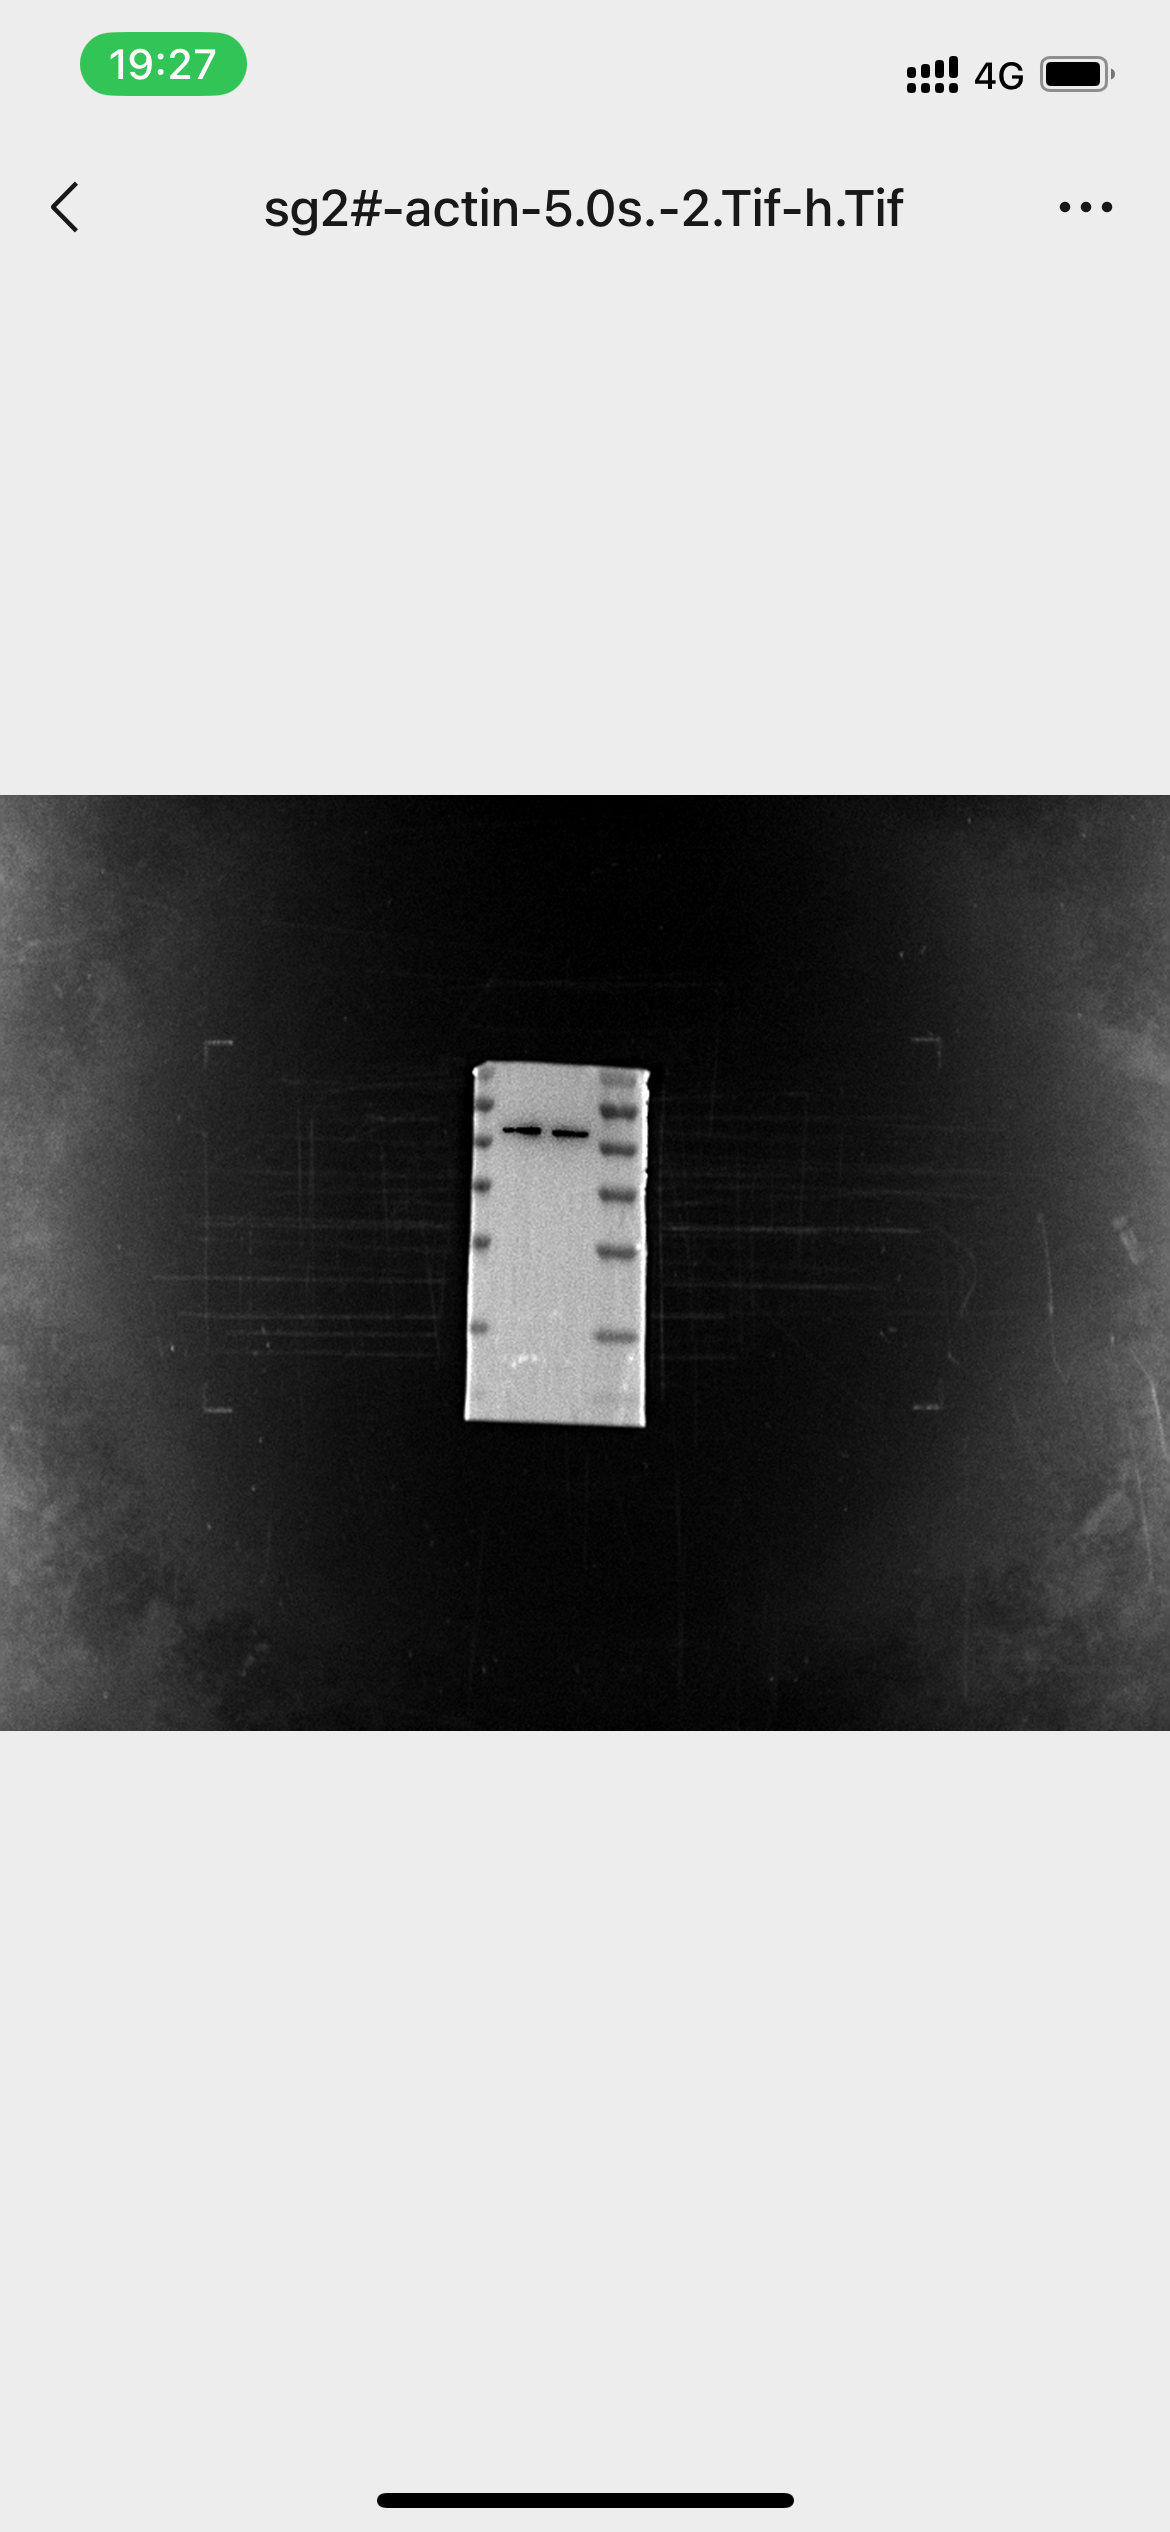


ITGA5

β-actin

115kDa

42kDa

sgNC

sgITGA5#1

sgITGA5#2


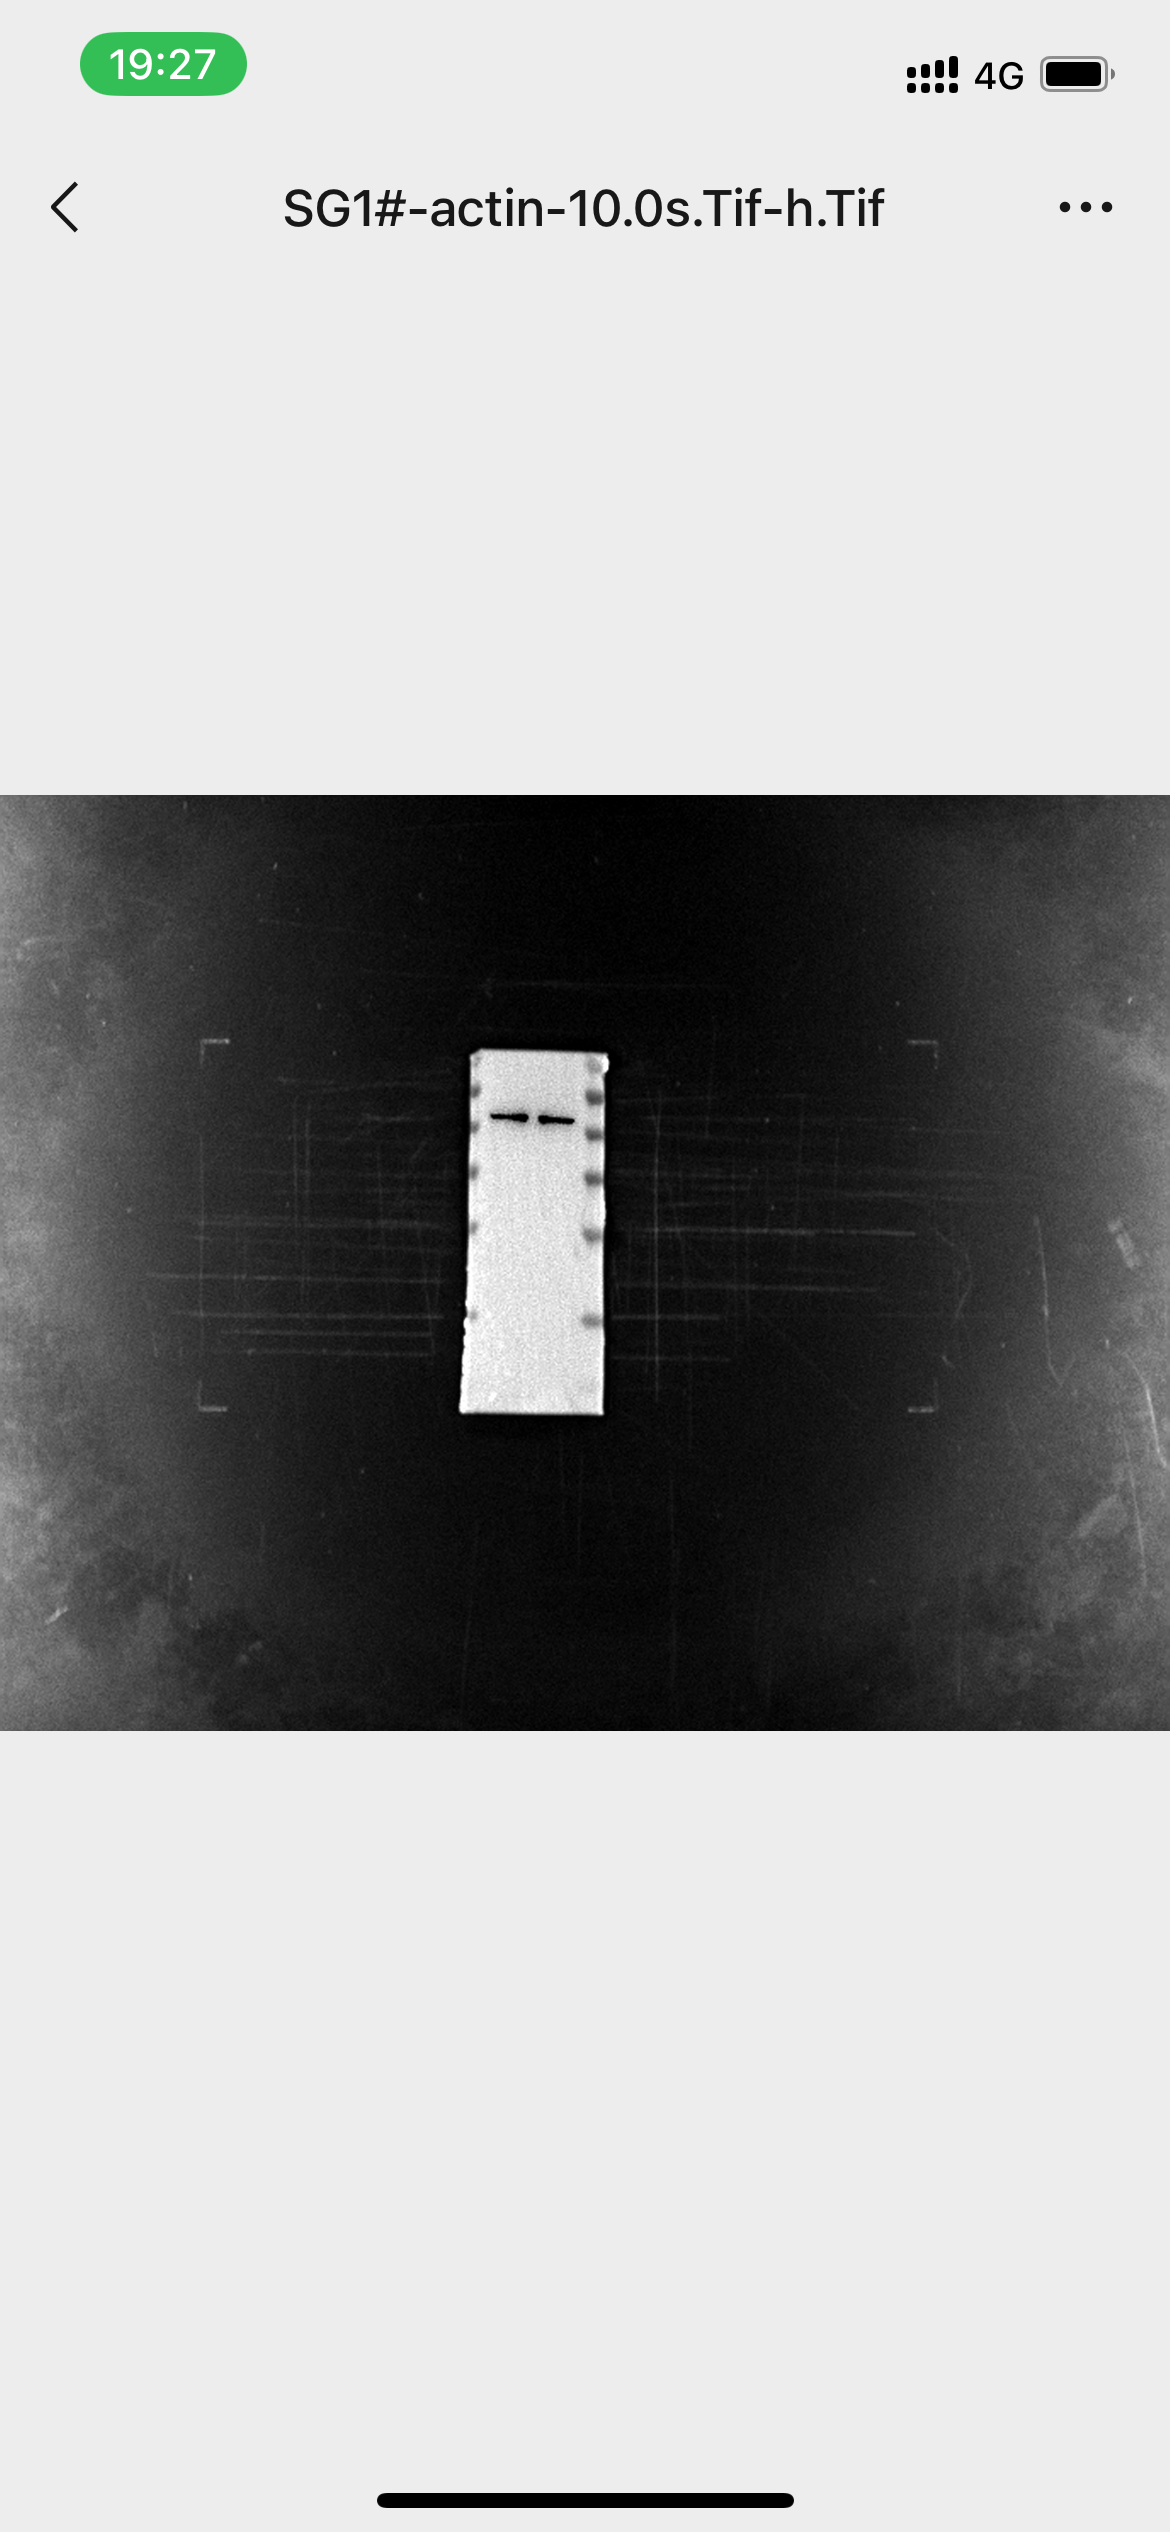


sgNC


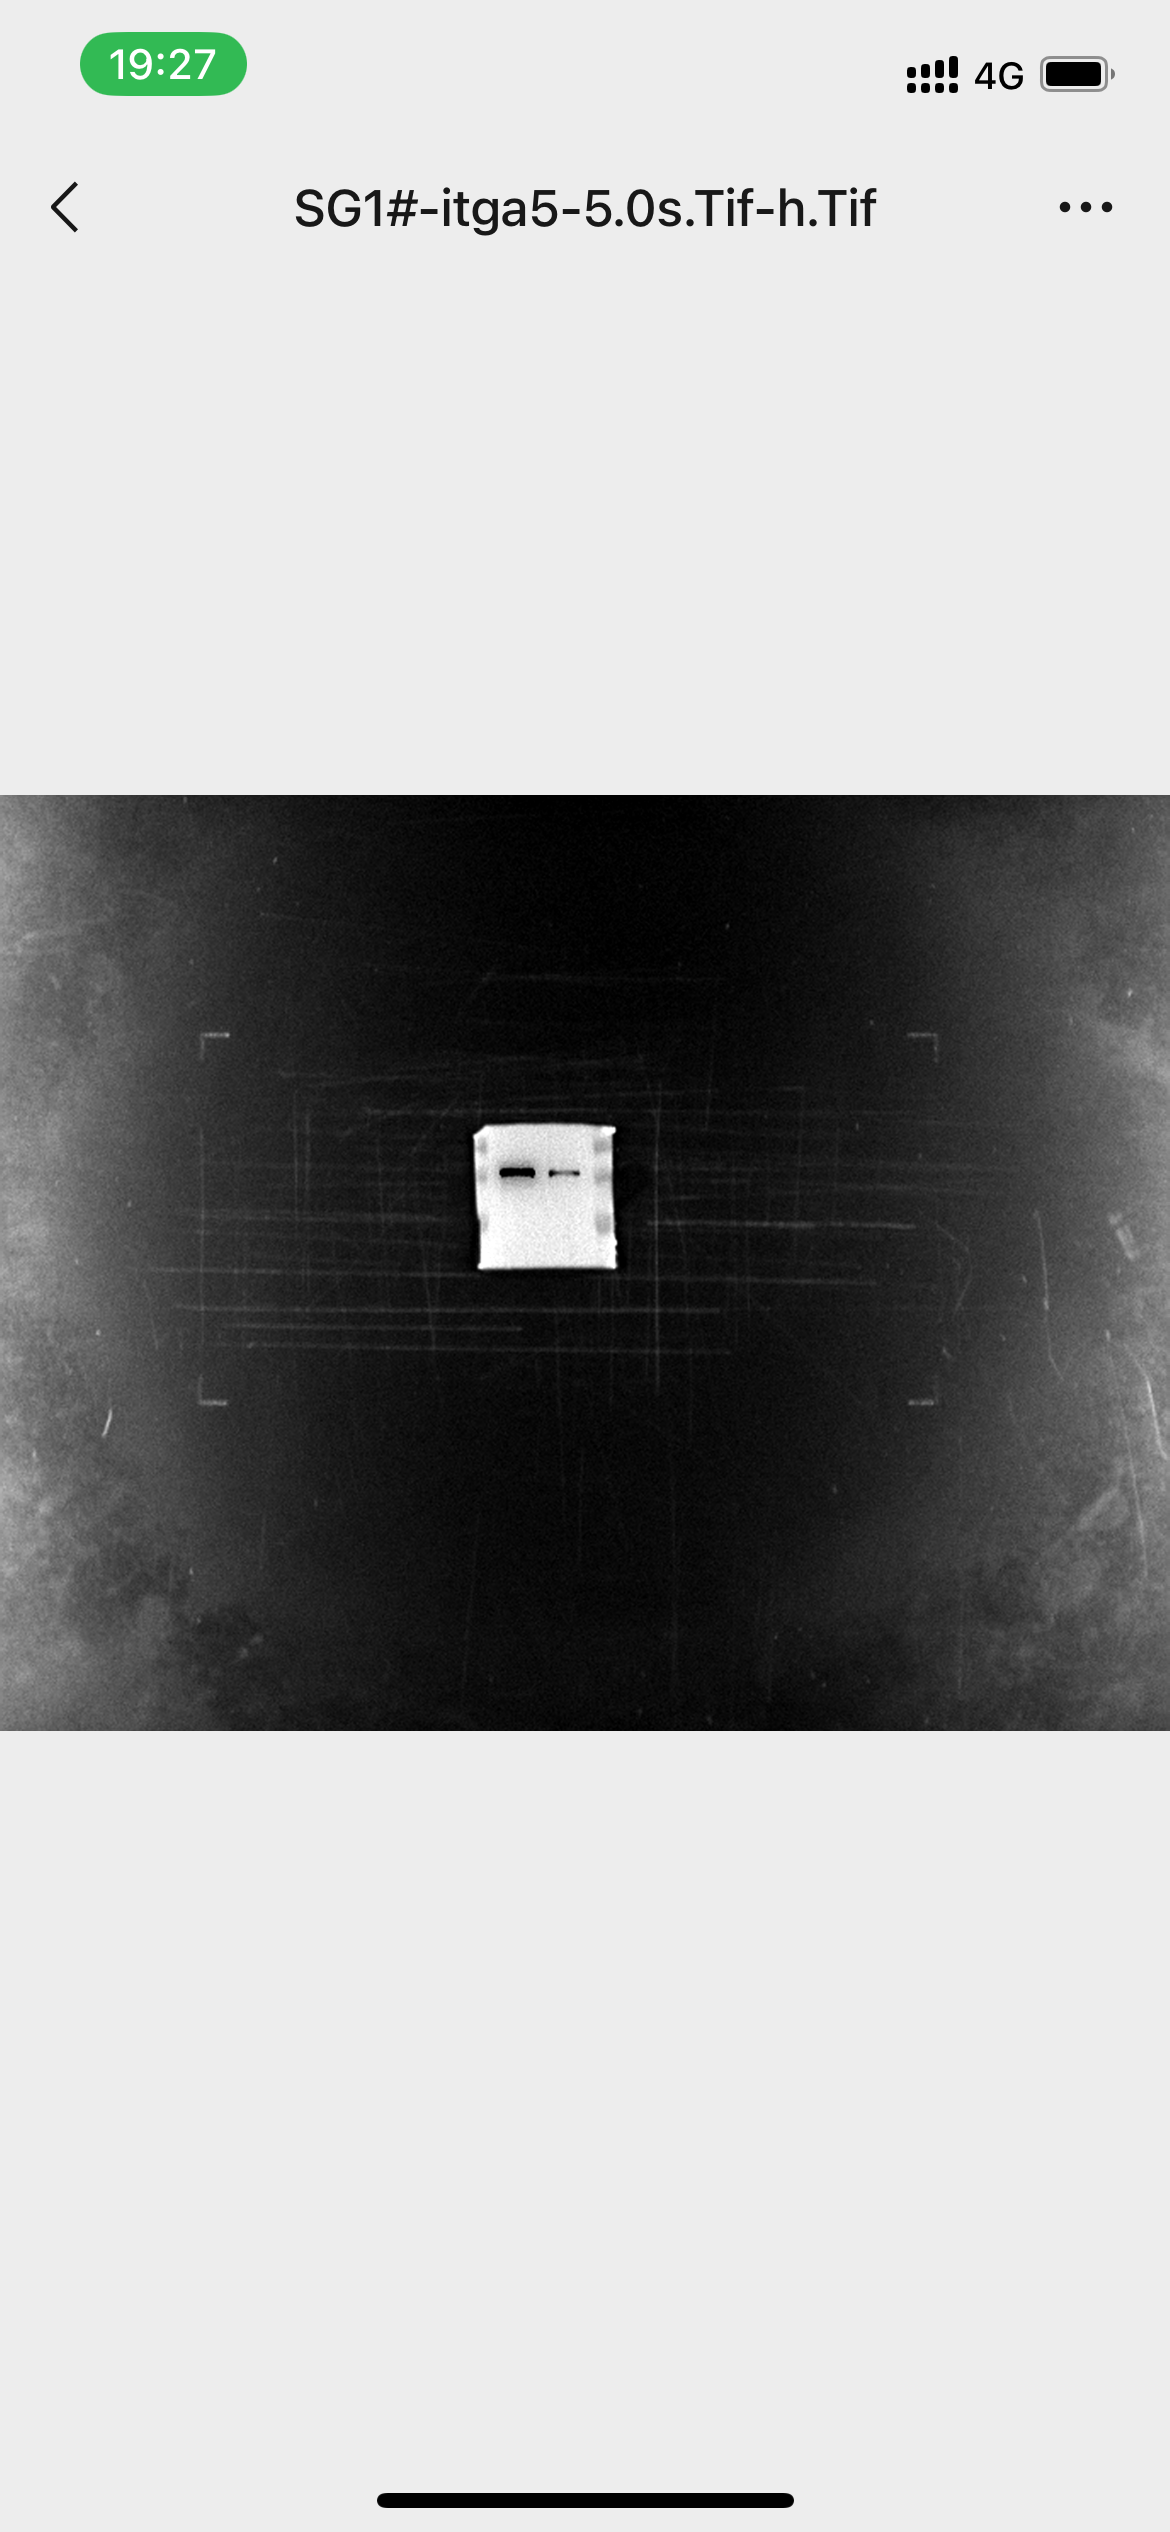

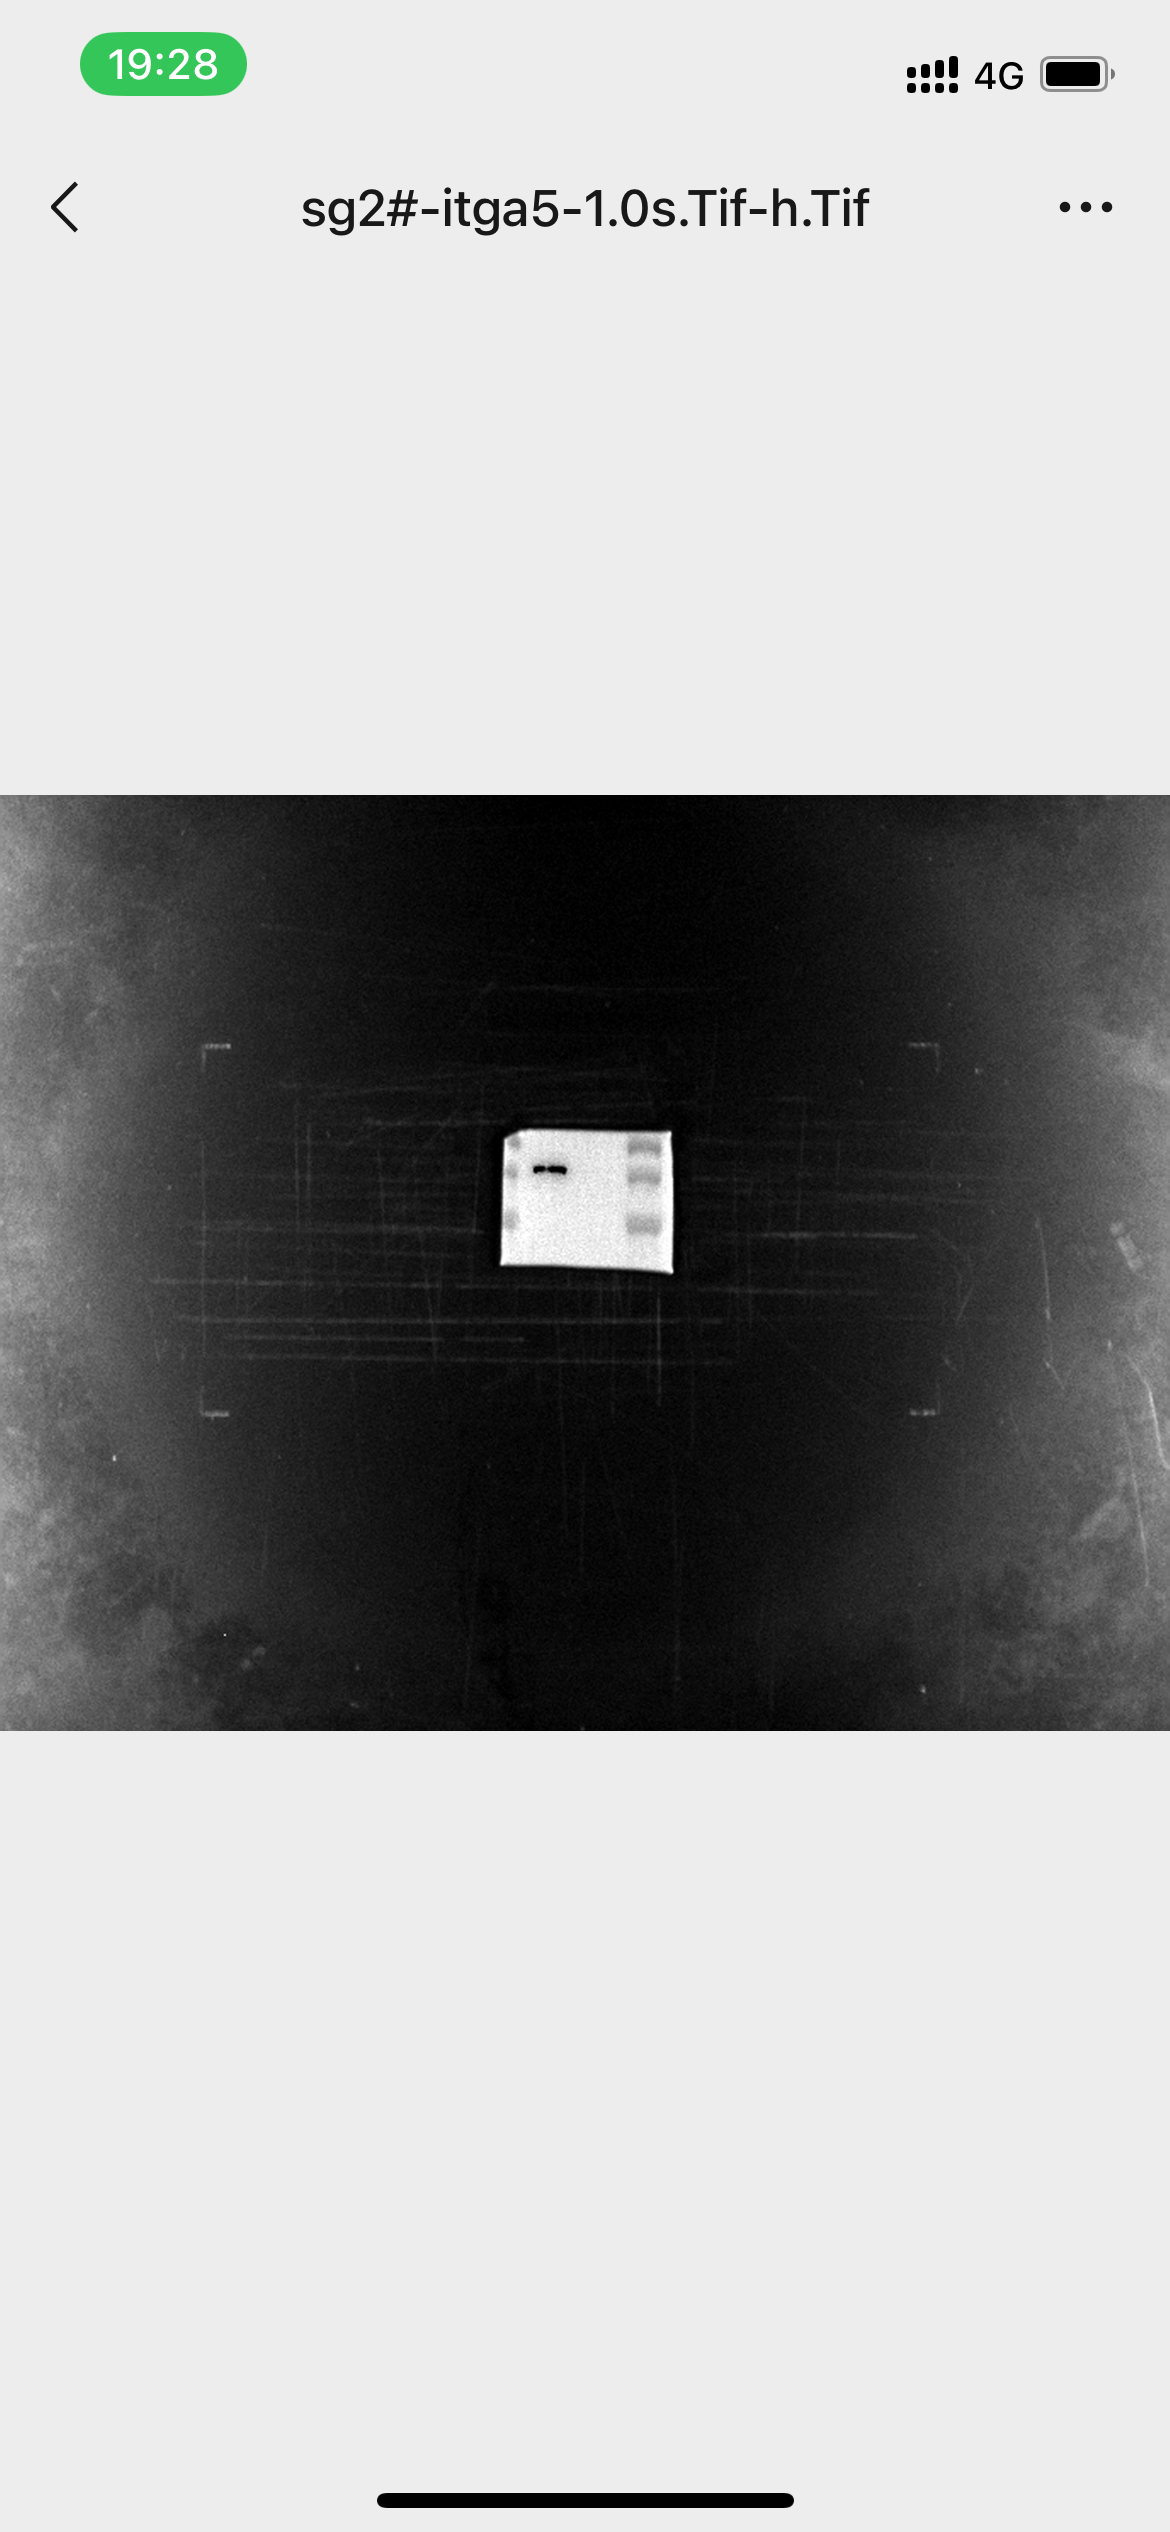


EA.hy926
